# Supplementary material for: WNT4 mediates estrogen receptor signaling and endocrine resistance in invasive lobular carcinoma cell lines
Source: Springer Nature journal article supplement (doi:10.1186/s13058-016-0748-7), 2016-09-20

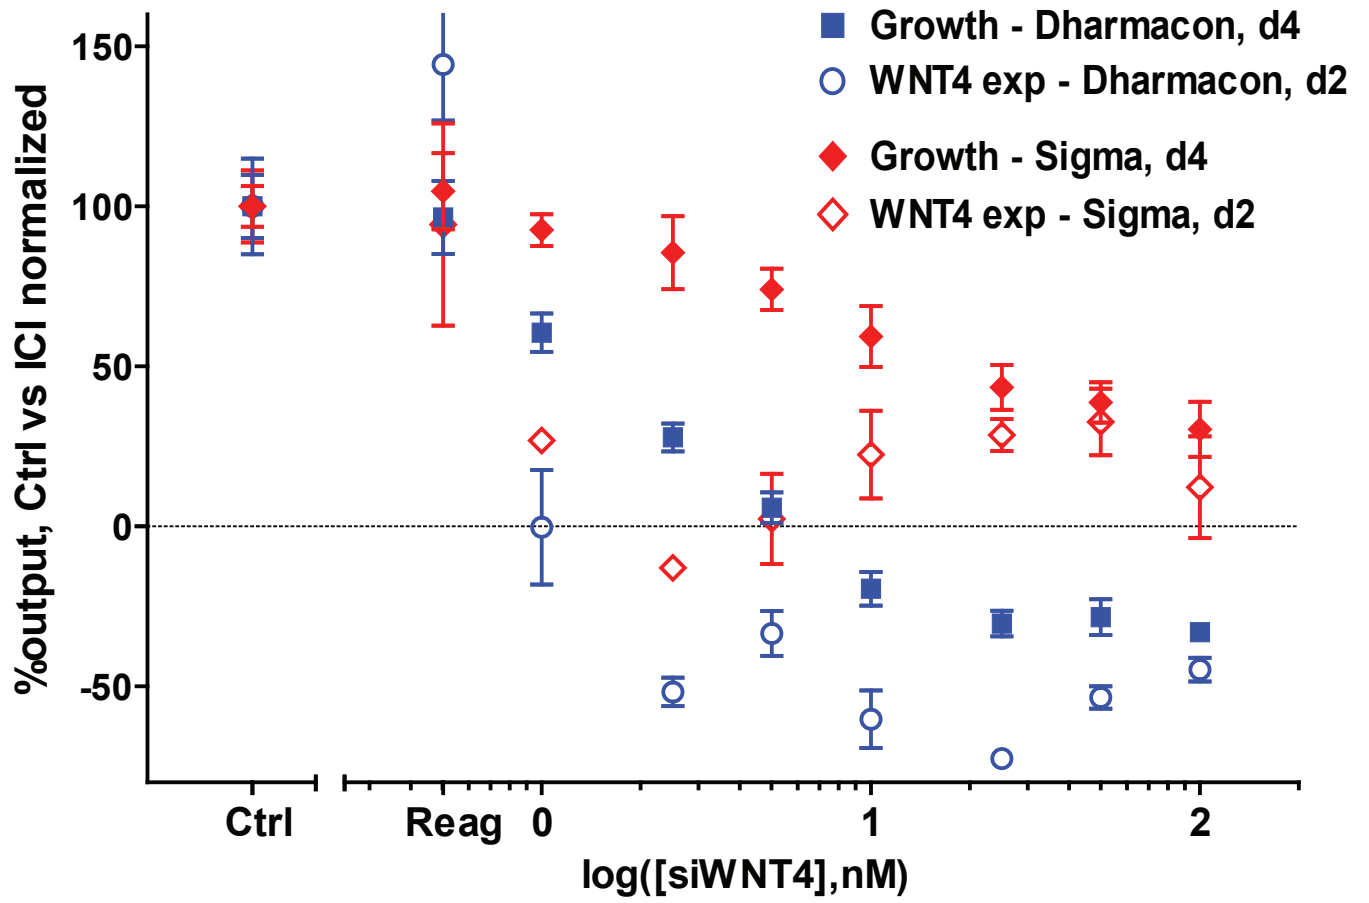

Supplement: MOESM3 [file 10721002]
